# Supplementary material
Source: publisher figshare collection journal article supplement (https://frontiersin.figshare.com/ndownloader/files/12728039)
Supplement: Supplementary file 1 [file 12728039]

## Sheet: Allele frequencies
Supplementary Table 2. Relative frequency and haplotype sharing of haplotypes indicating the species from which the reference alllele was identified, the number of individuals showing presence of a given haplotype (>20 reads), the species in which the haplotype was found, details on which population types haplotypes were shared between, and the predicted dominance of the haplotypes. Also shown ar…
454 Haplotypea	Reference allele	A2	A4	L2	L4	Species	Haplotype Sharing	Predicted Dominance	454 Allele	Allele Sharing	N haps
AHASRK07_HAP1	A. halleri	3	1			A	A2,A4	Predicted A2	AHASRK07	not L4*	3
AHASRK07_HAP2	A. halleri	1				A	A2	Predicted A2
AHASRK07_HAP3	A. halleri			1		L	L2	Predicted A2
AHASRK13_HAP1	A. halleri	4	1	3	4	AL	All	Predicted A2	AHASRK13	All	2
AHASRK13_HAP2	A. halleri	4				A	A2	Predicted A2
AHASRK15_DATABASE_HAP1	A. halleri		1			A	A4	Class A2	AHASRK15	A4	1
AHASRK16_DATABASE_HAP1	A. halleri	1				A	A2	Predicted A2	AHASRK16	A2	1
AHASRK20_DATABASE_HAP1	A. halleri			1		L	L2	Class A2	AHASRK20	A2,L2*	2
AHASRK20_HAP2	A. halleri	1				A	A2	Class A2
ALYSRK04_DATABASE_HAP1	A. lyrata		1		2	AL	A4,L4	Class A2	ALYSRK04	A4,L4	1
ALYSRK09_DATABASE_HAP1	A. lyrata	3	5	3	1	AL	All	Class A2	ALYSRK09	All**	1
ALYSRK11_DATABASE_HAP1	A. lyrata			4		L	L2	Class A2	ALYSRK11	not A2	2
ALYSRK11_HAP2	A. lyrata		1		3	AL	A4,L4	Class A2
ALYSRK12_DATABASE_HAP1	A. lyrata			1		L	L2	Class A2	ALYSRK12	L2	1
ALYSRK15_DATABASE_HAP1	A. lyrata	2	3	14	18	AL	All	Class A2	ALYSRK15	All**	1
ALYSRK19_DATABASE_HAP1	A. lyrata			6		L	L2	Class A2	ALYSRK19	not L4*	3
ALYSRK19_HAP2	A. lyrata	2	1			A	A2,A4	Class A2
ALYSRK19_HAP3	A. lyrata	1				A	A2	Class A2
ALYSRK20_HAP1	A. lyrata			1		L	L2	Class A2	ALYSRK20	L2	1
ALYSRK23_HAP1	A. lyrata	2				A	A2	Class A2	ALYSRK23	A2	1
ALYSRK27_HAP1	A. lyrata		2	2		AL	A4,L2	Predicted A2	ALYSRK27	not L4	2
ALYSRK27_HAP2	A. lyrata	1				A	A2	Predicted A2
ALYSRK30_DATABASE_HAP1	A. lyrata	1				AL	A2	Class A2	ALYSRK30	A2	2
ALYSRK30_HAP2	A. lyrata	1				A	A2	Class A2
ALYSRK34_DATABASE_HAP1	A. lyrata			5	2	L	L2,L4	Predicted A2	ALYSRK34	L2,L4	1
ALYSRK38_DATABASE_HAP1	A. lyrata	1				A	A2	Predicted A2	ALYSRK38	A2	1
ALYSRK39_DATABASE_HAP1	A. lyrata			3		L	L2	Predicted A2	ALYSRK39	L2, A4	2
ALYSRK39_HAP2	A. lyrata		1			A	A4	Predicted A2
ALYSRK42_HAP1	A. lyrata		3	1	2	AL	not A2	Class A2	ALYSRK42	All	2
ALYSRK42_HAP2	A. lyrata	2		2	10	AL	not A4	Class A2
ALYSRK43_DATABASE_HAP1	A. lyrata	1		6		AL	A2,L2	Predicted A2	ALYSRK43	A2,L2	1
ALYSRK50_DATABASE_HAP1	A. lyrata	3		1	1	AL	not A4	Class A2	ALYSRK50	not A4	3
ALYSRK50_HAP2	A. lyrata				1	L	L4	Predicted A2
ALYSRK50_HAP3	A. lyrata			3		L	L2	Predicted A2
AASRK50_DATABASE_HAP1	A. arenosa		1		2	AL	A4,L4	Predicted A2	AaSRK50	A4,L4	1
NEW1_HAP1 (BOSRK04-like)	B. oleracea			4		L	L2	Predicted A2	NEW1	L2	1
NEW4_HAP1* (AHG-haplogroup B)	A. lyrata		1		2	AL	A4,L4	Predicted A2	NEW4	A4,L4	1
NEW5_HAP1 (BRSRK60-like)	B. rapa	3				A	A2	Predicted A2	NEW5	not A4	2
NEW5_HAP2 (BRSRK60-like)	B. rapa			2	1	L	L2,L4	Predicted A2
NEW6_HAP1 (AHASRK04-like)	A. halleri	2			1	AL	A2,L4	Predicted A2	NEW6	A2,L4	1
NEW8_HAP1 (AlySRK04-like)	A. lyrata	1				A	A2	Predicted A2	NEW8	not A4	3
NEW8_HAP2 (AlySRK04-like)	A. lyrata			1		L	L2	Predicted A2
NEW8_HAP3 ((AlySRK04-like)	A. lyrata				1	L	L4	Predicted A2
AHASRK14_DATABASE_HAP1	A. halleri	2	1			A	A2,A4	Class A3	AHASRK14	A2,A4	1
AHASRK17_HAP1	A. halleri			2	25	L	L2,L4	Class A3	AHASRK17	All*	2
AHASRK17_HAP2	A. halleri	3	3			A	A2,A4	Class A3
AHASRK25_HAP1	A. halleri				1	L	L4	Predicted A3	AHASRK25	L4	1
AHASRK30_DATABASE_HAP1	A. halleri				3	L	L4	Predicted A3	AHASRK30	A2,L4*	2
AHASRK30_HAP2	A. halleri	1				A	A2	Predicted A3
ALYSRK05_DATABASE_HAP1	A. lyrata		8	2	1	AL	not A2	Class A3	ALYSRK05	not A2	1
ALYSRK13_HAP1	A. lyrata		2	5	4	AL	not A2	Class A3	ALYSRK13	All	2
ALYSRK13_HAP2	A. lyrata	1				A	A2	Class A3
ALYSRK16_DATABASE_HAP1	A. lyrata			2	4	L	L2,L4	Class A3	ALYSRK16	All	3
ALYSRK16_HAP2	A. lyrata			4		L	L2	Class A3
ALYSRK16_HAP3	A. lyrata	11	1		3	AL	not L2	Class A3
ALYSRK16-like_DATABASE_HAP1	A. lyrata		8			A	A4	Predicted A3	ALYSRK16-like	A4	1
ALYSRK17_DATABASE_HAP1	A. lyrata			1		L	L2	Class A3	ALYSRK17	All*	4
ALYSRK17_HAP2	A. lyrata			9	4	L	L2,L4	Class A3
ALYSRK17_HAP3	A. lyrata	1				A	A2	Class A3
ALYSRK17_HAP4	A. lyrata		2		5	AL	A4,L4	Class A3
ALYSRK21_DATABASE_HAP1	A. lyrata				2	L	L4	Class A3	ALYSRK21	L4	2
ALYSRK21_HAP2	A. lyrata				3	L	L4	Class A3
ALYSRK37_HAP1	A. lyrata			1	1	L	L2,L4	Class A3	ALYSRK37	L2,L4	1
ALYSRK48_DATABASE_HAP1	A. lyrata	2	3	2	9	AL	All	Predicted A3	ALYSRK48	All	1
CGRSRK7_DATABASE_HAP1	C. rubella	3				A	A2	Class A3	CGRSRK7	A2	1
NEW3_HAP1 (AHASRK17-like)	A. halleri				6	L	L4	Predicted A3	NEW3	L4	1
NEW10_HAP1 (AHASRK17-like)	A. halleri		1		1	AL	A4,L4	Predicted A3	NEW10	A4,L4	1
NEW17_HAP1 (AHASRK17-like)	A. halleri		1			A	A4	Predicted A3	NEW17	A4	1
AHASRK08_DATABASE_HAP1	A. halleri			1	2	L	L2,L4	Class B	AHASRK08	All	5
AHASRK08_HAP3	A. halleri		3			A	A4	Class B
AHASRK08_HAP4	A. halleri		1	8	1	AL	not A2	Class B
AHASRK08_HAP5	A. halleri	3				A	A2	Class B
ALYSRK03_DATABASE_HAP1	A. lyrata	8	5	8	5	AL	All	Class B	ALYSRK03	All**	1
ALYSRK06_DATABASE_HAP1	A. lyrata			3		L	L2	Class B	ALYSKR06	not A2*	2
ALYSRK06_HAP2	A. lyrata		7		1	AL	A4,L4	Class B
ALYSRK08_DATABASE_HAP1	A. lyrata	1		3	10	AL	not A4	Class B	ALYSRK08	All	3
ALYSRK08_HAP2	A. lyrata	4	8	4	3	AL	All	Class B
ALYSRK08_HAP3	A. lyrata		1			A	A4	Class B
ALYSRK14_HAP1	A. lyrata			2	3	L	L2,L4	Class B	ALYSRK14	All	4
ALYSRK14_HAP2	A. lyrata	3	2		1	AL	not L2	Class B
ALYSRK14_HAP3	A. lyrata	1				A	A2	Class B
ALYSRK14_HAP4	A. lyrata		1			A	A4	Class B
ALYSRK18_DATABASE_HAP1	A. lyrata			15	5	L	L2,L4	Class B	ALYSRK18	L2,L4	2
ALYSRK18_HAP2	A. lyrata			1		L	L2	Class B
ALYSRK28_DATABASE_HAP1	A. lyrata	3	4			AL	A2,A4	Class B	ALYSRK28	not L4	3
ALYSRK28_HAP2	A. lyrata	1	4	1		AL	not L4	Class B
ALYSRK28_HAP3	A. lyrata			6		L	L2	Class B
ALYSRK29_DATABASE_HAP1	A. lyrata			1	7	L	L2,L4	Class B	ALYSRK29	All	5
ALYSRK29_HAP2	A. lyrata	2	2	6	14	AL	All	Class B
ALYSRK29_HAP3	A. lyrata	8	1			A	A2,A4	Class B
ALYSRK29_HAP4	A. lyrata				1	L	L4	Class B
ALYSRK29_HAP5	A. lyrata	2	6		2	AL	not L2	Class B
NEW7_HAP1 (SRK30-like)	A. lyrata	1				A	A2	Predicted B	NEW7	not L2	2
NEW7_HAP2 (SRK30-like)	A. lyrata		5		1	AL	A4,L4	Predicted B
NEW16_HAP1 (SRK06-like)	A. lyrata	3	3			A	A2,A4	Predicted B	NEW16	A2,A4	1
AHASRK27_DATABASE_HAP1	A. halleri	1	4			A	A2,A4	Predicted Unlinked	AHASRK27	A2,A4	3
AHASRK27_HAP2	A. halleri		1			A	A4	Predicted Unlinked
AHASRK27_HAP3	A. halleri		1			A	A4	Predicted Unlinked
AASRK26_DATABASE_HAP1	A. arenosa	5	2			A	A2,A4	Predicted Unlinked	AASRK26	A2,A4	1
NEW2_HAP1 (Aly13-7-like)	A. lyrata		6	1		AL	A4,L2	Predicted Unlinked	NEW2	A4,L2	1
NEW9_HAP1 (AHASRK27-like)	A. halleri		1			A	A4	Predicted Unlinked	NEW9	A4	1
NEW11_HAP1 (CGR5-like)	C. rubella		1		30	A	A4,L4	Predicted Unlinked	NEW11	not L2	2
NEW11_HAP2 (CGR5-like)	C. rubella	4	7			A	A2,A4	Predicted Unlinked
NEW12_HAP1 (AHASRK27-like)	A. lyrata		2			A	A4	Predicted Unlinked	NEW12	A4	1
NEW13_HAP1 (AHASRK27-like)	A. halleri	1			11	AL	A2,L4	Predicted Unlinked	NEW13	A2,L4	1
NEW14_HAP1 (AHASRK27-like)	A. halleri		1			A	A4	Predicted Unlinked	NEW14	A4	1
NEW15_HAP1 (Aly13-7-like)	A. lyrata	2	1			A	A2,A4	Predicted Unlinked	NEW15	A2,A4	1
										* Different haplotypes lyrata and arenosa
a Bold = found in genome mining; italics = found in long Sanger sequencing										** only a single allele shared across all populations
